# Supplementary material
Source: ML conference proceedings conference paper supplement (https://proceedings.mlr.press/v38/meshi15.html)
Supplement: Supplementary file [file meshi15-supp.pdf]

---

# Supplementary Material

## Efficient Training of Structured SVMs via Soft Constraints

---

### A Dual of Soft Problem

In this section we show that the problems Eq. (5) and Eq. (6) are Lagrange duals. We start from a formulation equivalent to Eq. (6):

$$\begin{aligned}
\min_{w, \xi, \delta} \quad & \frac{\lambda}{2} \|w\|^2 + \frac{\rho}{2} \sum_m \|\delta^{(m)}\|^2 + \sum_m \sum_\alpha \xi_\alpha^{(m)} \\
\text{s.t.} \quad & \xi_i^{(m)} \geq \frac{1}{M} \left( \theta_i^{(m)}(y_i; w) + \sum_{c: i \in c} \delta_{ci}^{(m)}(y_i) \right) \quad \text{for all } m, i, y_i \\
& \xi_c^{(m)} \geq \frac{1}{M} \left( \theta_c^{(m)}(y_c; w) - \sum_{i: i \in c} \delta_{ci}^{(m)}(y_i) \right) \quad \text{for all } m, c, y_c
\end{aligned}$$

The Lagrangian is:

$$\begin{aligned}
L(w, \xi, \delta, \mu \geq 0) = & \frac{\lambda}{2} \|w\|^2 + \frac{\rho}{2} \sum_m \|\delta^{(m)}\|^2 + \sum_m \sum_\alpha \xi_\alpha^{(m)} \\
& - \sum_m \sum_i \sum_{y_i} \mu_i^{(m)}(y_i) \left( \xi_i^{(m)} - \frac{1}{M} \theta_i^{(m)}(y_i; w) - \frac{1}{M} \sum_{c: i \in c} \delta_{ci}^{(m)}(y_i) \right) \\
& - \sum_m \sum_c \sum_{y_c} \mu_c^{(m)}(y_c) \left( \xi_c^{(m)} - \frac{1}{M} \theta_c^{(m)}(y_c; w) + \frac{1}{M} \sum_{i: i \in c} \delta_{ci}^{(m)}(y_i) \right)
\end{aligned}$$

The optimality conditions entail:

$$\begin{aligned}
w = & \frac{1}{\lambda M} \sum_m \sum_\alpha \sum_{y_\alpha} \mu_\alpha^{(m)}(y_\alpha) \left( \phi_\alpha(x^{(m)}, y_\alpha^{(m)}) - \phi_\alpha(x^{(m)}, y_\alpha) \right) = \Psi \mu \\
\sum_{y_\alpha} \mu_\alpha(y_\alpha) = & 1 \quad \text{for all } m, \alpha = \{c, i\} \\
\delta_{ci}^{(m)}(y_i) = & \frac{1}{\rho M} \left( \mu_c^{(m)}(y_i) - \mu_i^{(m)}(y_i) \right) \quad \text{for all } m, c, i \in c, y_i \quad \Rightarrow \delta = A \mu
\end{aligned}$$

Using those in the Lagrangian yields the dual problem of Eq. (5).

### B Proof of Theorem 4.1

In this section we prove Theorem 4.1, which is restated here for convenience.

**Theorem 4.1** *Let  $g_\rho^*$  be the optimal value of  $G_\rho$ , and let  $g^*$  be the optimal value of  $G$ . Then  $g_\rho^* - \frac{\rho}{2}h \leq g^* \leq g_\rho^*$ , where  $h = M(8Y_{\max}q(BR + L))^2$ .*

*Proof.* Denote by  $(w^*, \delta^*)$  an optimal solution to  $g$ , and by  $(w_\rho^*, \delta_\rho^*)$  an optimal solution to  $g_\rho$ .

For the first direction, we have:

$$\begin{aligned}
 g^* &= \min_{w, \delta} g(w, \delta) \\
 &\leq g(w_\rho^*, \delta_\rho^*) \\
 &\leq g(w_\rho^*, \delta_\rho^*) + \frac{\rho}{2} \|\delta_\rho^*\|^2 \\
 &= g_\rho^*
 \end{aligned}$$

Using the bound  $\|\delta^*\|^2 \leq h$ , we can prove the other direction:

$$\begin{aligned}
 g_\rho^* &= \min_{w, \delta} \left( g(w, \delta) + \frac{\rho}{2} \|\delta\|^2 \right) \\
 &\leq g(w^*, \delta^*) + \frac{\rho}{2} \|\delta^*\|^2 \\
 &= g^* + \frac{\rho}{2} \|\delta^*\|^2 \\
 &\leq g^* + \frac{\rho}{2} h
 \end{aligned}$$

To conclude the proof, we next show that  $\|\delta^*\|^2 \leq h$  by bounding  $\|\delta^{(m)*}\| \leq 8Y_{\max}q(BR + L)$ . □

### B.1 Bounding $\|\delta\|^2$

In this section we prove the bound<sup>11</sup>  $\|\delta^*\|^2 \leq h(\theta)$ , where  $h(\theta) = (4Y_{\max}q\|\theta\|_\infty)^2$ . Since  $\|\theta\|_\infty \leq 2BR + L$ , this concludes the proof of Theorem 4.1. The proof here is the zero-temperature limit of the proof in Meshi et al. (2012) [see Lemma 1.2 in the appendix therein].

We actually prove this bound for any  $\delta$  such that  $\sigma(\delta) \leq \sigma(0) \equiv \kappa(\theta)$ , where  $\sigma(\delta) = \sum_i \max_{y_i} (\theta_i(y_i; w) + \sum_{c:i \in c} \delta_{ci}(y_i)) + \sum_c \max_{y_c} (\theta_c(y_c; w) - \sum_{i:i \in c} \delta_{ci}(y_i))$ . This obviously holds at the optimum  $\delta^*$ . Our goal is to bound  $\|\delta\|^2$  under this constraint. Since shifting  $\delta_{ci}(\cdot)$  by a constant does not change the value of the solution, but changes the norm arbitrarily, we need to add some constraints.

In particular, we require that:

$$\sum_{y_i} \delta_{ci}(y_i) = 0 \quad \text{for all } c, i$$

We will actually find:

$$\max_{\delta} \|\delta\|_1 \quad \text{s.t. } \sigma(\delta) \leq \kappa(\theta), \text{ and } \sum_{y_i} \delta_{ci}(y_i) = 0 \quad \forall c, i \tag{7}$$

Since  $\|\delta\|_2 \leq \|\delta\|_1$  this implies a bound on  $\|\delta\|_2^2$ .

We begin by formulating an equivalent optimization problem to Eq. (7):

$$\begin{aligned}
 \max_{\delta, \bar{\delta}} & \frac{1}{2} \sum_c \sum_{i:i \in c} \sum_{y_i} u_{ci}(y_i) \delta_{ci}(y_i) + \frac{1}{2} \sum_c \sum_{i:i \in c} \sum_{y_i} u_{ci}(y_i) \bar{\delta}_{ci}(y_i) \\
 \text{s.t.} & \sigma(\delta, \bar{\delta}) \leq \kappa(\theta) \\
 & \sum_{y_i} \bar{\delta}_{ci}(y_i) = 0 \quad \forall c, i \\
 & \delta = \bar{\delta}
 \end{aligned} \tag{8}$$

maximizing externally over  $u_{ci}(y_i) \in \{-1, +1\}$ , and where:

$$\sigma(\delta, \bar{\delta}) = \sum_c \max_{y_c} \left( \theta_c(y_c) - \sum_{i:i \in c} \delta_{ci}(y_i) \right) + \sum_i \max_{y_i} \left( \theta_i(y_i) + \sum_{c:i \in c} \bar{\delta}_{ci}(y_i) \right)$$

<sup>11</sup>To simplify notation we drop the sample index  $m$  and the dependence on  $w$ .

We will upper bound the dual of this problem.

The Lagrangian is:

$$\begin{aligned}
 L(\delta, \bar{\delta}, \tau, \eta, \beta) &= \frac{1}{2} \sum_c \sum_{i:i \in c} \sum_{y_i} u_{ci}(y_i) \delta_{ci}(y_i) + \frac{1}{2} \sum_c \sum_{i:i \in c} \sum_{y_i} u_{ci}(y_i) \bar{\delta}_{ci}(y_i) \\
 &\quad + \tau \kappa(\theta) - \tau \sum_i \max_{y_i} \left( \theta_i(y_i) + \sum_{c:i \in c} \bar{\delta}_{ci}(y_i) \right) - \tau \sum_c \max_{y_c} \left( \theta_c(y_c) - \sum_{i:i \in c} \delta_{ci}(y_i) \right) \\
 &\quad + \sum_c \sum_{i:i \in c} \sum_{y_i} \eta_{ci}(y_i) (\delta_{ci}(y_i) - \bar{\delta}_{ci}(y_i)) \\
 &\quad + \sum_c \sum_{i:i \in c} \beta_{ci} \sum_{y_i} \bar{\delta}_{ci}(y_i)
 \end{aligned}$$

with  $\tau \geq 0$ .

Rearranging terms we obtain:

$$\begin{aligned}
 &= -\tau \sum_i \max_{y_i} \left( \theta_i(y_i) + \sum_{c:i \in c} \left( \bar{\delta}_{ci}(y_i) - \sum_{y'_i} \frac{1}{\tau} \bar{\delta}_{ci}(y'_i) \left( \frac{1}{2} u_{ci}(y'_i) - \eta_{ci}(y'_i) + \beta_{ci} \right) \right) \right) \\
 &\quad - \tau \sum_c \max_{y_c} \left( \theta_c(y_c) - \sum_{i:i \in c} \left( \delta_{ci}(y_i) - \sum_{y'_i} \frac{1}{\tau} \delta_{ci}(y'_i) \left( \frac{1}{2} u_{ci}(y'_i) + \eta_{ci}(y'_i) \right) \right) \right) \\
 &\quad + \tau \kappa(\theta)
 \end{aligned}$$

The Lagrangian dual is therefore:

$$\begin{aligned}
 &= \min_{\tau \geq 0, \eta, \beta} -\tau \sum_i \min_{\bar{\delta}_{ci}(\cdot)} \max_{y_i} \left( \theta_i(y_i) + \sum_{c:i \in c} \left( \bar{\delta}_{ci}(y_i) - \sum_{y'_i} \frac{1}{\tau} \bar{\delta}_{ci}(y'_i) \left( \frac{1}{2} u_{ci}(y'_i) - \eta_{ci}(y'_i) + \beta_{ci} \right) \right) \right) \\
 &\quad - \tau \sum_c \min_{\delta_{ci}(\cdot)} \max_{y_c} \left( \theta_c(y_c) - \sum_{i:i \in c} \left( \delta_{ci}(y_i) - \sum_{y'_i} \frac{1}{\tau} \delta_{ci}(y'_i) \left( \frac{1}{2} u_{ci}(y'_i) + \eta_{ci}(y'_i) \right) \right) \right) \\
 &\quad + \tau \kappa(\theta)
 \end{aligned} \tag{9}$$

We next replace the local singleton/factor problems with their dual problems. This yields the dual problem of (8):

$$\begin{aligned}
 &\min_{\tau \geq 0, \eta, \beta} \tau \left( \kappa(\theta) - \sum_i \max_{\mu_i} \sum_{y_i} \mu_i(y_i) \theta_i(y_i) - \sum_c \max_{\mu_c} \sum_{y_c} \mu_c(y_c) \theta_c(y_c) \right) \\
 &\quad \text{s.t. } \mu_i \geq 0, \quad \mu_c \geq 0, \quad \sum_{y_i} \mu_i(y_i) = 1, \quad \sum_{y_c} \mu_c(y_c) = 1 \\
 &\quad \mu_i(y_i) = \frac{\frac{1}{2} u_{ci}(y_i) - \eta_{ci}(y_i) + \beta_{ci}}{\tau} \quad \text{for all } i, c : i \in c, y_i \\
 &\quad \mu_c(y_c) = -\frac{\frac{1}{2} u_{ci}(y_i) + \eta_{ci}(y_i)}{\tau} \quad \text{for all } c, i : i \in c, y_i
 \end{aligned} \tag{10}$$

Next, consider the objective in Eq. (10):

$$f(\tau, \eta, \beta) = \tau \left( \kappa(\theta) + \sum_i \min_{\mu_i} \sum_{y_i} \mu_i(y_i) (-\theta_i(y_i)) + \sum_c \min_{\mu_c} \sum_{y_c} \mu_c(y_c) (-\theta_c(y_c)) \right)$$

For feasible  $\mu$  (satisfies the constraints in Eq. (10)), it holds that:

$$f(\tau, \eta, \beta) \leq \tau \left( \kappa(\theta) + \sum_i \max_{y_i} |\theta_i(y_i)| + \sum_c \max_{y_c} |\theta_c(y_c)| \right)$$

(of course, this is true for the optimal  $\mu$  as well).

Therefore, for all  $\delta$  satisfying the constraints of Eq. (7), if we can find  $\tau \geq 0, \eta, \beta$  such that the constraints of Eq. (10) are satisfied, then by weak duality we have:

$$\begin{aligned} \|\delta\|_1 &\leq \max_u \sum_c \sum_{i:i \in c} \sum_{y_i} u_{ci}(y_i) \delta_{ci}(y_i) \\ &\leq f(\tau, \eta, \beta) \\ &\leq \tau \left( \kappa(\theta) + \sum_i \max_{y_i} |\theta_i(y_i)| + \sum_c \max_{y_c} |\theta_c(y_c)| \right) \end{aligned} \quad (11)$$

So now we need to find  $\tau \geq 0, \eta$  and  $\beta$  such that  $\mu$  is feasible.

Notice that in order to tighten the bound we want  $\tau$  to be as small as possible.

Finally, choosing:

$$\begin{aligned} \tau &= 2 \max_i |Y_i| \\ \eta_{ci}(y_i) &= \frac{1}{2} u_{ci}(y_i) - \frac{1}{|Y_i|} \sum_{y'_i} u_{ci}(y'_i) - \frac{\tau}{|Y_i|} \\ \beta_{ci} &= -\frac{1}{|Y_i|} \sum_{y_i} u_{ci}(y_i) \end{aligned}$$

yields:

$$\mu_i(y_i) = \frac{1}{|Y_i|}$$

So the singletons are uniform (and feasible!).

As for the factor variables:

$$\mu_c(y_i) = \frac{\frac{1}{|Y_i|} \sum_{y'_i} u_{ci}(y'_i) - u_{ci}(y_i)}{2 \max_{i'} |Y_{i'}|} + \frac{1}{|Y_i|}$$

Notice that if we sum this over  $y_i$  we get 1, as required. Also notice that since  $-1 \leq u_{ci}(y_i) \leq 1$  then:

$$\mu_c(y_i) \geq \frac{-1 - 1}{2 \max_{i'} |Y_{i'}|} + \frac{1}{|Y_i|} \geq -\frac{1}{|Y_i|} + \frac{1}{|Y_i|} = 0$$

as required.

So if we set:

$$\begin{aligned} \hat{\mu}_i(y_i) &= \frac{\frac{1}{|Y_i|} \sum_{y'_i} u_{ci}(y'_i) - u_{ci}(y_i)}{2 \max_{i'} |Y_{i'}|} + \frac{1}{|Y_i|} \\ \mu_c(x_c) &= \prod_{i:i \in c} \hat{\mu}_i(y_i) \end{aligned}$$

we obtain the desired (feasible!) factor marginals.

To conclude, we can use  $\tau = 2 \max_i |Y_i|$  in the bound of Eq. (11) to get:

$$\begin{aligned} \|\delta\|_2 &\leq \|\delta\|_1 \leq 2 \max_i |Y_i| \left( \kappa(\theta) + \sum_i \max_{y_i} |\theta_i(y_i)| + \sum_c \max_{y_c} |\theta_c(y_c)| \right) \\ &= 2 \max_i |Y_i| \left( \sigma(0) + \sum_i \max_{y_i} |\theta_i(y_i)| + \sum_c \max_{y_c} |\theta_c(y_c)| \right) \\ &\leq 4 \max_i |Y_i| \left( \sum_i \max_{y_i} |\theta_i(y_i)| + \sum_c \max_{y_c} |\theta_c(y_c)| \right) \\ &\leq 4 Y_{\max} q \|\theta\|_\infty \equiv \sqrt{h(\theta)} \end{aligned}$$

## C Proof of Theorem 4.2

In this section we prove Theorem 4.2. For simplicity, we denote  $w_\rho^\epsilon = w(\mu_\rho^\epsilon)$  and  $\delta_\rho^\epsilon = \delta(\mu_\rho^\epsilon)$ .

$$\begin{aligned}
 \epsilon &\geq g_\rho(w_\rho^\epsilon, \delta_\rho^\epsilon) - f_\rho(\mu_\rho^\epsilon) && \text{[duality gap bound]} \\
 &\geq g_\rho(w_\rho^\epsilon, \delta_\rho^\epsilon) - g_\rho^* && [f_\rho(\mu_\rho) \leq g_\rho^* \quad \forall \mu_\rho] \\
 &\geq g(w_\rho^\epsilon, \delta_\rho^\epsilon) - g_\rho^* && [g_\rho(w, \delta) \geq g(w, \delta) \quad \forall w, \delta] \\
 &\geq g(w_\rho^\epsilon, \delta_\rho^\epsilon) - g^* - \frac{\rho}{2}h && \text{[Theorem 4.1]}
 \end{aligned}$$

## D Efficient Implementation

In this section we provide details on the implementation of Algorithm 1. Specifically, the update in line 15 of Algorithm 1 maintains primal quantities:  $w = \Psi\mu$  and  $\delta = A\mu$ . In order to do this efficiently, we exploit the fact that at each iteration only a single  $\mu_\alpha^{(m)}$  block is changed. This means that only  $w_\alpha$  and  $\delta^{(m)}$  variables that depend on  $\mu_\alpha^{(m)}$  need to be updated. In particular, for the weights we obtain:

$$w_\alpha \leftarrow w_\alpha + \gamma \Psi_{m,\alpha} (s_\alpha - \mu_\alpha^{(m)}),$$

where  $\mu_\alpha^{(m)}$  is the value before applying the update. Notice that only parameters pertaining to factor  $\alpha$  are changed, so the cost is often much smaller than the full dimension  $d$ . As mentioned in Section 5, the algorithm can be implemented in terms of primal quantities. This requires storing a weight vector for each sample and factor  $w_{m,\alpha} = \Psi_{m,\alpha} \mu_\alpha^{(m)}$ . Again, only weights related to the specific factor  $\alpha$  need to be stored, so the required space is often smaller than  $d$ . We can then carry out the update above in terms of  $w_{m,\alpha}$  instead of  $\Psi_{m,\alpha} \mu_\alpha^{(m)}$ .

Similarly, for the agreement variables  $\delta$  we have the update:

$$\begin{aligned}
 \text{Factor } c \text{ updated:} & \quad \delta_{ci}^{(m)} \leftarrow \delta_{ci}^{(m)} + \frac{\gamma}{\rho M} A_{ci} (s_c - \mu_c^{(m)}) && \forall i : i \in c \\
 \text{Variable } i \text{ updated:} & \quad \delta_{ci}^{(m)} \leftarrow \delta_{ci}^{(m)} + \frac{\gamma}{\rho M} (s_i - \mu_i^{(m)}) && \forall c : i \in c
 \end{aligned}$$

where, as before,  $\mu_\alpha^{(m)}$  is the value before updating. Notice that the computational cost of this update depends on the degree of the factor graph. When a factor  $c$  contains many variables in its scope, storing the marginal distribution  $\mu_c$  may be prohibitive. In that case we can store instead only the marginals  $\mu_{ci}^{(m)} = A_{ci} \mu_c^{(m)}$ , which only requires  $|Y_i|$  space (this has the same dimension as  $\delta_{ci}$ , so we never have to store higher dimensional variables than the ones already stored). As before, the updates can then be implemented in terms of the compact  $\mu_{ci}^{(m)}$  and  $\mu_i^{(m)}$  values.

Finally, notice that we can compute the optimal step size  $\gamma$  in Algorithm 1 using only the auxiliary variables  $w_{m,\alpha}$ ,  $\mu_{ci}^{(m)}$  and  $\mu_i^{(m)}$ .

## E Computing the Curvature Constant

To complete the convergence rate analysis in Section 5.1 we need to compute the curvature constant  $C_{f_\rho}^\otimes$ . It is shown in Lacoste-Julien et al. (2013) that for product domains the global curvature constant is a sum of the block-wise curvature constants:  $C_{f_\rho}^\otimes = \sum_{m,\alpha} C_{f_\rho}^{(m,\alpha)}$ . Furthermore, the curvature constant of a single block is bounded in terms of the Hessian as follows:

$$C_{f_\rho}^{(m,\alpha)} \leq \sup_{\substack{\mu, \mu' \in S, \\ (\mu' - \mu) \in S_\alpha^{(m)}, \\ z \in [\mu, \mu'] \subseteq S}} (\mu' - \mu)^\top \nabla^2 f(z) (\mu' - \mu),$$

To use this bound, we compute the Hessian for our problem<sup>12</sup> Eq. (5):  $\nabla_{\mu}^2 = \lambda \Psi^{\top} \Psi + \rho A^{\top} A$ , which is constant in  $\mu$ . Using arguments similar to Lemma A.2 in Lacoste-Julien et al. (2013), we obtain:

$$\begin{aligned}
 C_{f_{\rho}}^{(m,\alpha)} &\leq \sup_{\substack{\mu, \mu' \in S, \\ (\mu' - \mu) \in S_{\alpha}^{(m)}}} (\mu' - \mu)^{\top} (\lambda \Psi^{\top} \Psi + \rho A^{\top} A) (\mu' - \mu) \\
 &\leq \lambda \sup_{\substack{\mu, \mu' \in S, \\ (\mu' - \mu) \in S_{\alpha}^{(m)}}} \|\Psi(\mu' - \mu)\|_2^2 + \rho \sup_{\substack{\mu, \mu' \in S, \\ (\mu' - \mu) \in S_{\alpha}^{(m)}}} \|A(\mu' - \mu)\|_2^2 \\
 &\leq 4\lambda \sup_{u \in \Psi S_{\alpha}^{(m)}} \|u\|_2^2 + 4\rho \sup_{v \in A S_{\alpha}^{(m)}} \|v\|_2^2 \\
 &\leq \frac{16R^2}{\lambda M^2} + \frac{4\hat{R}^2}{\rho M^2}
 \end{aligned}$$

where  $\max_{m,\alpha,y_{\alpha}} \|\phi_{\alpha}(x^{(m)}, y_{\alpha}) - \phi_{\alpha}(x^{(m)}, y_{\alpha}^{(m)})\|_2 \leq 2R$  is the maximal feature difference, and  $\hat{R}^2 = 1 + \max_{m,\alpha,y_{\alpha}} \frac{|Y_{\alpha}|}{|Y_i|}$  is the maximal number of marginalized assignments.

Finally, we have:

$$C_{f_{\rho}}^{\otimes} = \sum_{m,\alpha} C_{f_{\rho}}^{(m,\alpha)} \leq 4Mq \left( \frac{4R^2}{\lambda M^2} + \frac{\hat{R}^2}{\rho M^2} \right) = O \left( \frac{q}{M} \left( \frac{1}{\lambda} + \frac{1}{\rho} \right) \right)$$

## References

- S. Lacoste-Julien, M. Jaggi, M. Schmidt, and P. Pletscher. Block-coordinate Frank-Wolfe optimization for structural SVMs. In *ICML*, pages 53–61, 2013.
- O. Meshi, T. Jaakkola and A. Globerson. Convergence rate analysis of MAP coordinate minimization algorithms. In *Advances in Neural Information Processing Systems*. 2012.

<sup>12</sup>Here we actually use the *negative* of Eq. (5) and treat this as a minimization problem.
